# Supplementary material
Source: PubMed Central journal article supplement (PMC3936823)
Supplement: nn304235j_si_001.pdf [file nn304235j_si_001.pdf]

**A**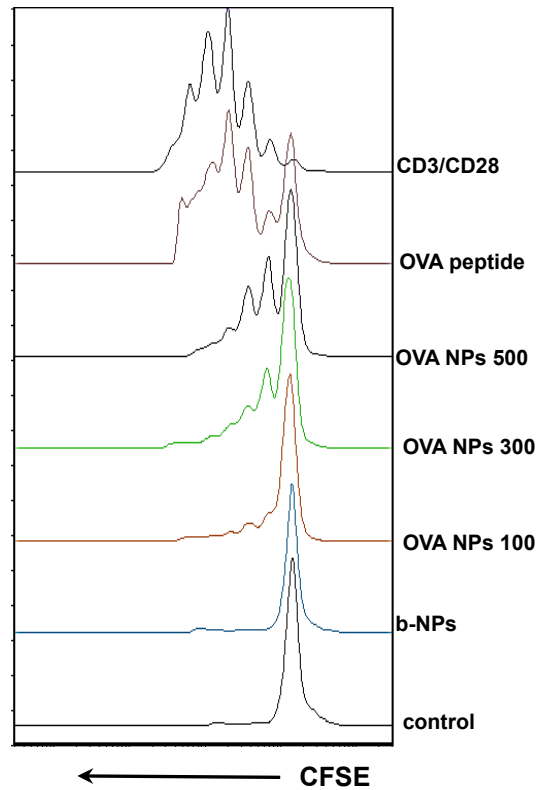**B**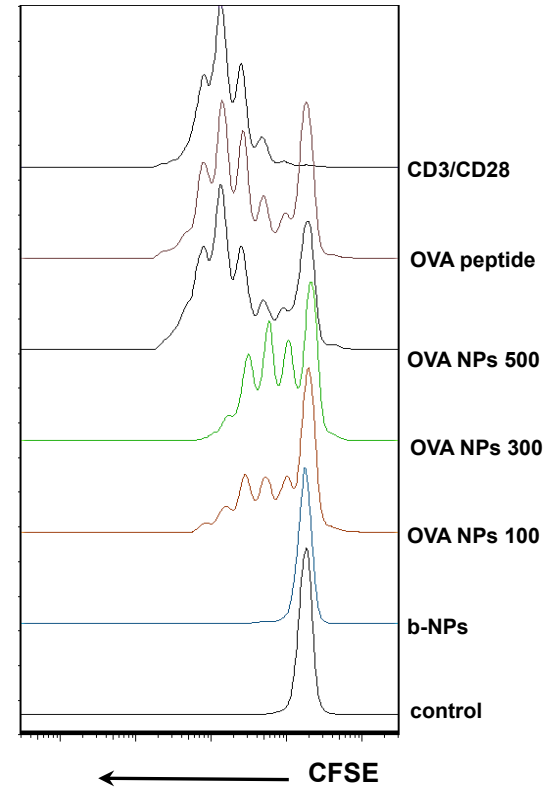

**Supplementary Figure 1: OVA-nanoparticles activate BMDCs *in vitro* and consequently stimulate antigen specific T cells.** Representative flow cytometric histogram demonstrating proliferation profiles of OT-II CD4<sup>+</sup> (**A**) and OT-I CD8<sup>+</sup> (**B**) CFSE labeled T cells following co-culture with BMDCs unpulsed and pulsed with b-NPs, various concentrations ( $\mu\text{g/ml}$ ) of OVA-NPs, OVA peptide (OVA<sup>323-339</sup>/OVA<sup>257-264</sup>), or with anti-CD3 and anti-CD28 antibodies alone (control).

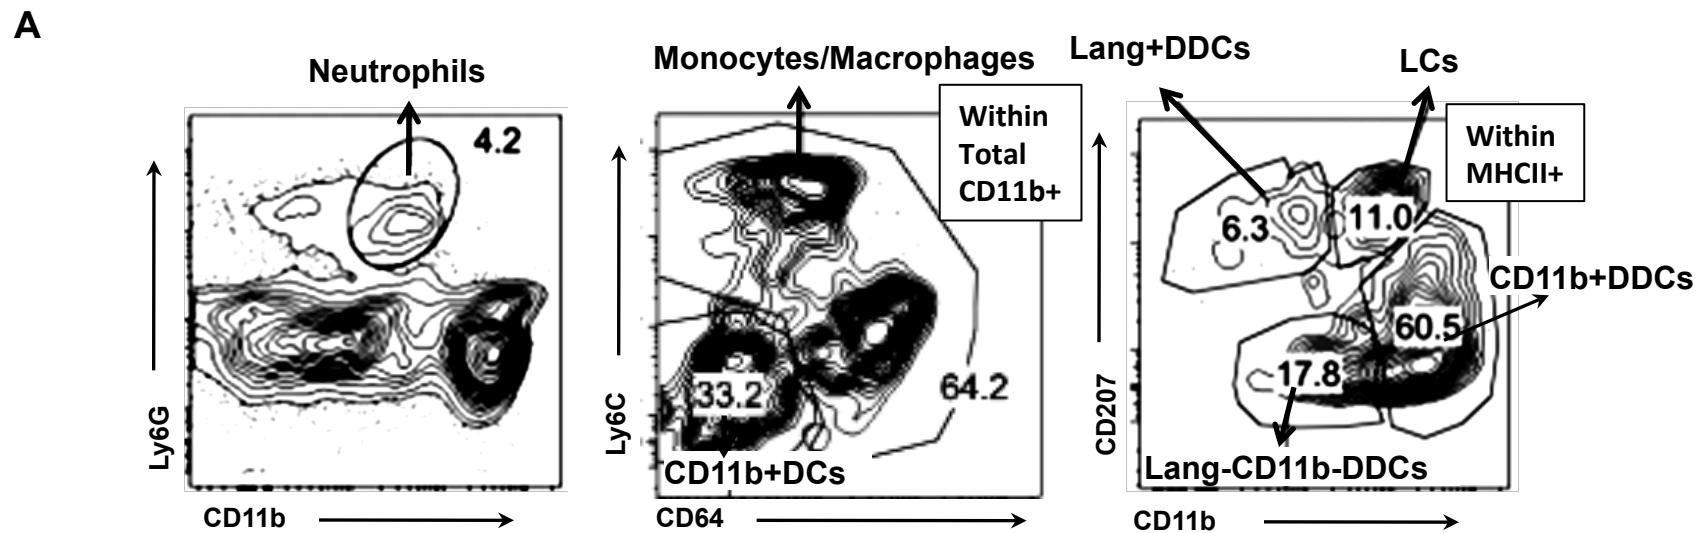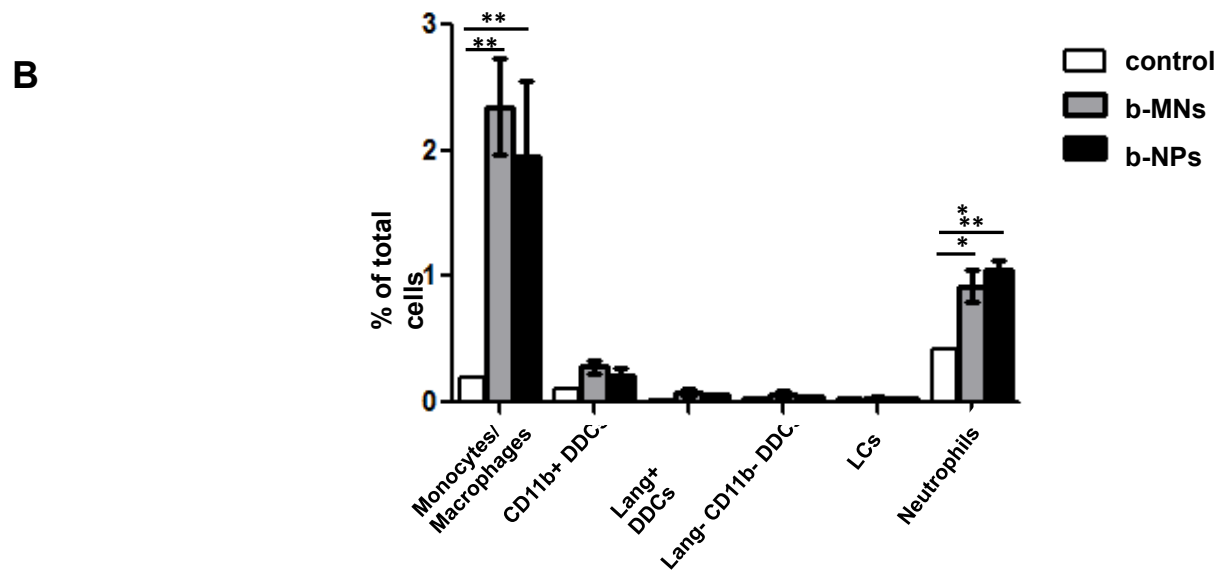

**Supplementary Figure 2: Recruitment of innate immune cells 24 hours following microneedle intradermal application.** **A)** FACS analysis demonstrating the gating strategy used for identification of different infiltrating cell types isolated from the ear skin. Neutrophils were gated as Ly6G<sup>+</sup> CD11b<sup>+</sup> cells, and based on the expression of Ly6C and CD64 within CD11b<sup>+</sup> cells, monocytes/macrophages are identified. Expression of CD207 and CD11b was assessed among MHCII<sup>high</sup> CD11c<sup>+</sup> DCs, leading to the identification of CD11b<sup>+</sup> DDC (CD207<sup>+</sup> CD11b<sup>+</sup>), Lang<sup>+</sup> DDC (CD207<sup>+</sup> CD11b<sup>-</sup>), Lang-CD11b-DCs (CD207<sup>-</sup> CD11b<sup>-</sup>) and LCs (CD207<sup>+</sup> CD11b<sup>+</sup>). **B)** Bar graph comparing percentage of infiltrating cells detected in ear skin 24 h following application of blank MNs (b-MNs) or MNs laden with b-NPs (b-NPs) or from non-vaccinated mice (control) are shown, as assessed by flow cytometry.

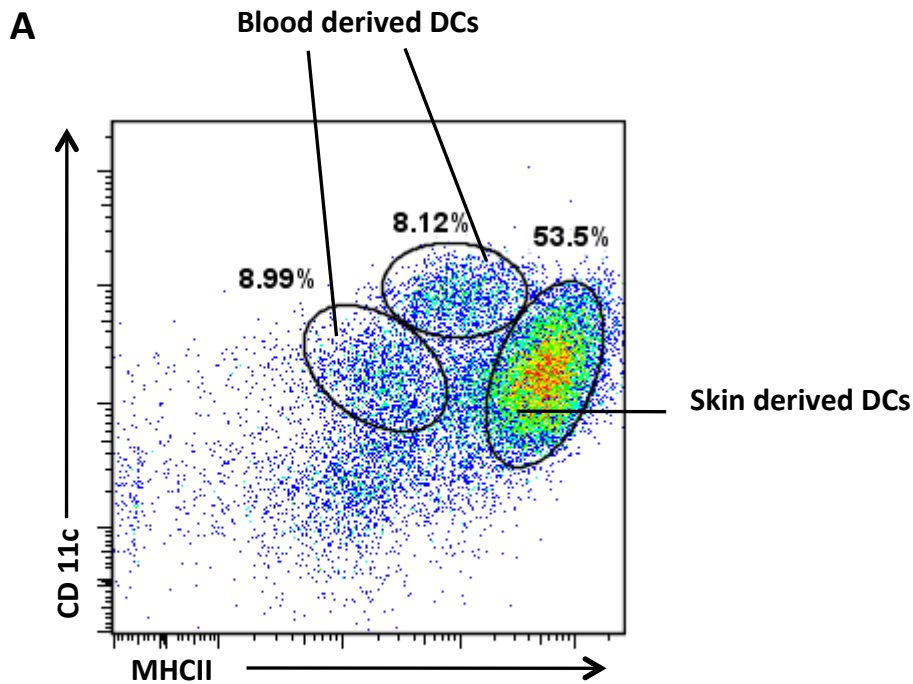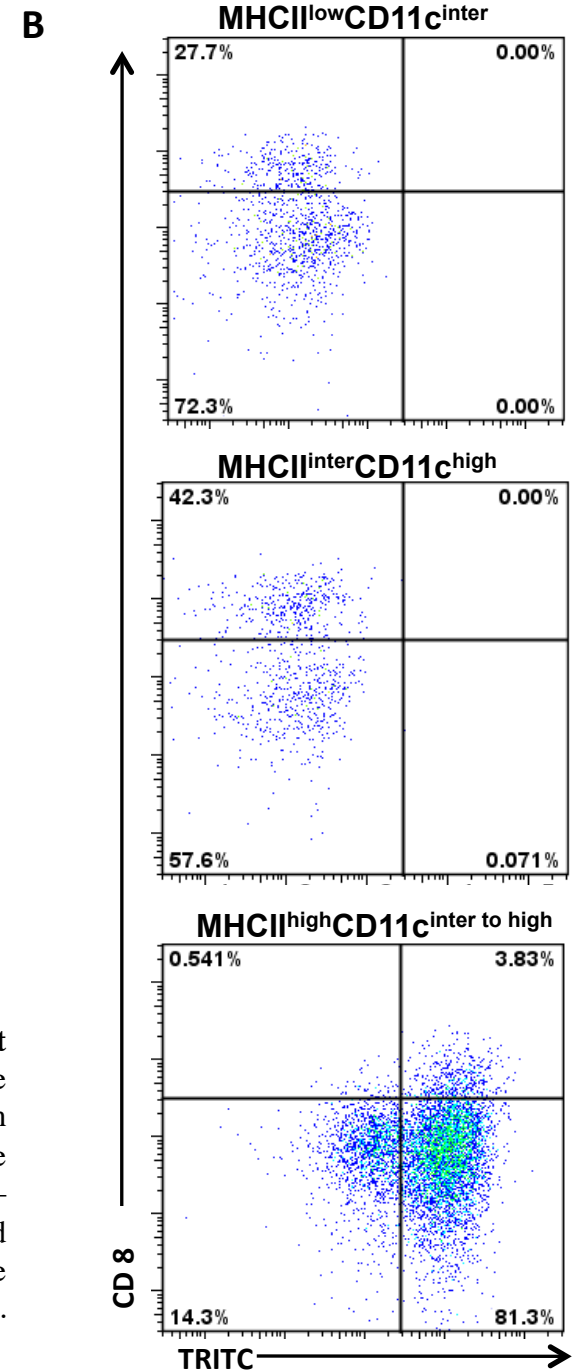

**Supplementary Figure 3: Nanoparticles delivered by microneedle application are not taken up by blood derived DC subsets** **A)** Flow cytometry dot plot analysis for the expression of CD11c *versus* MHCII among large cells isolated from the auricular LNs 24 h post MNs mediated TRITC-NPs delivery. As indicated, three populations of DCs can be distinguished in the skin draining LNs, as previously described<sup>48</sup>: skin derived – MHCII<sup>high</sup>CD11c<sup>inter to high</sup> and two blood derived DC subsets – MHCII<sup>inter</sup>CD11c<sup>high</sup> and MHCII<sup>low</sup>CD11c<sup>inter</sup>. **B)** Corresponding DC subsets were separately analyzed for the expression of TRITC and CD8 $\alpha$ . All the blood-derived DCs are found to be TRITC negative. Results are representative of two independent experiments.

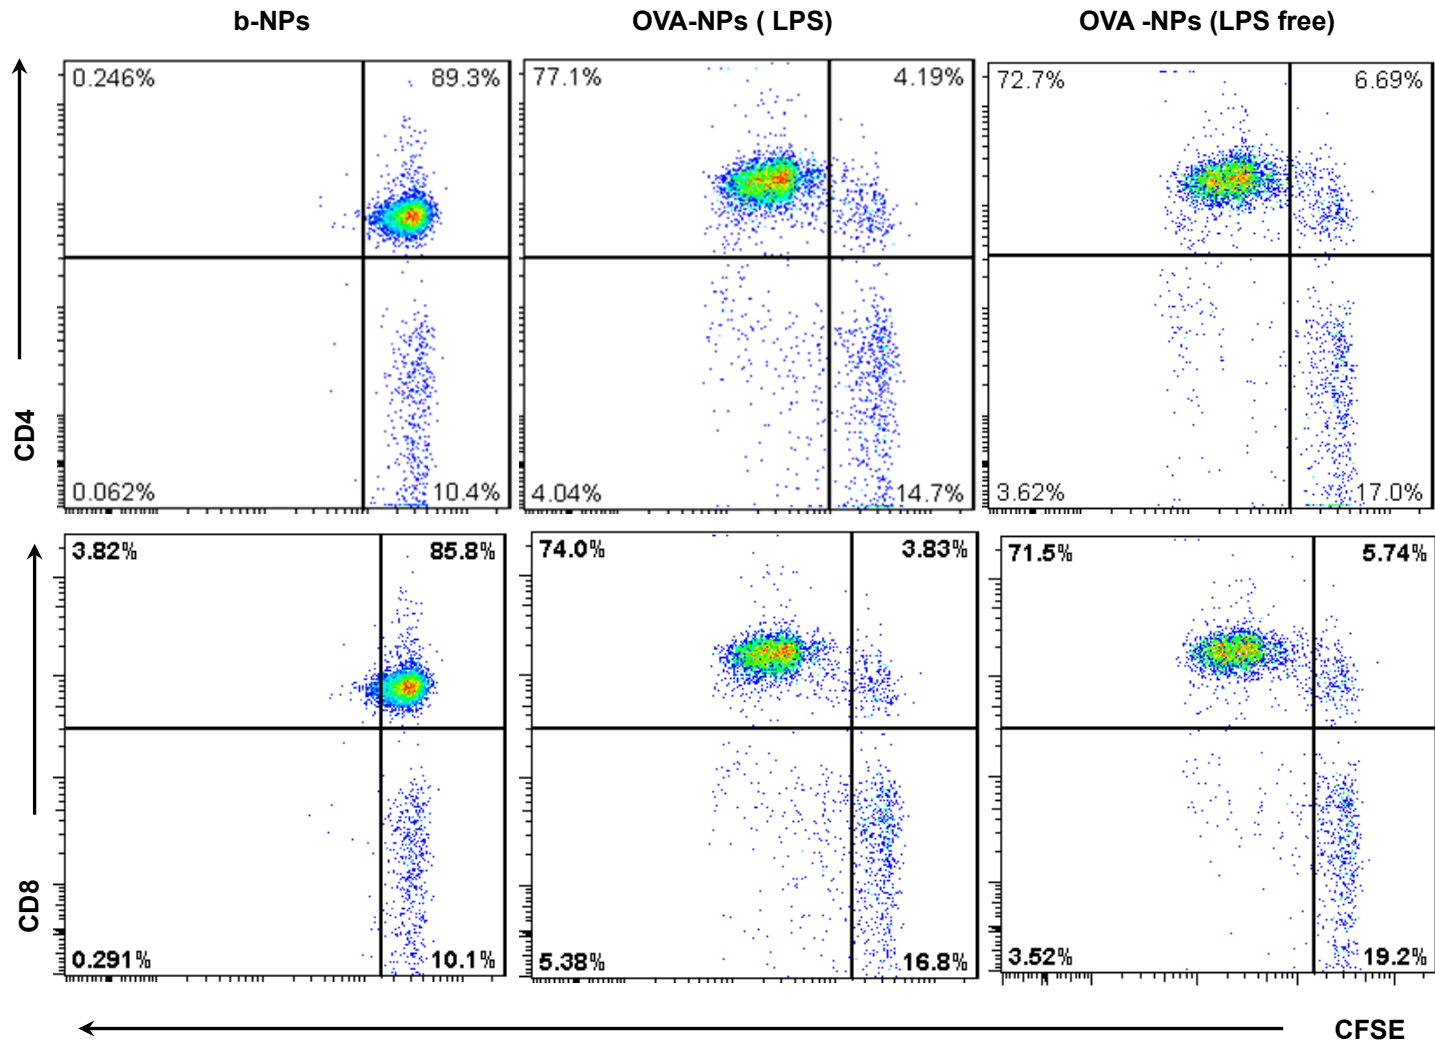

**Supplementary Figure 4: OVA derived LPS contamination does not significantly enhance T cell proliferation by skin derived DCs following microneedle immunization.** Congenic CD45.1<sup>+</sup> mice were injected *i.v.* with CFSE-labeled OVA-specific CD4<sup>+</sup> or CD8<sup>+</sup> T cells (CD45.2<sup>+</sup>). The following day, MNs laden with b-NPs, OVA-NPs or LPS-free OVA-NPs were applied to mice ears. Proliferation of OT-I and OT-II cells isolated from auricular LNs was examined 3 days post immunization by flow cytometry. Dot-plots represent CFSE dilutions of CD4<sup>+</sup>CD45.2<sup>+</sup> (*upper panels*) or CD8<sup>+</sup>CD45.2<sup>+</sup> cells (*lower panels*).

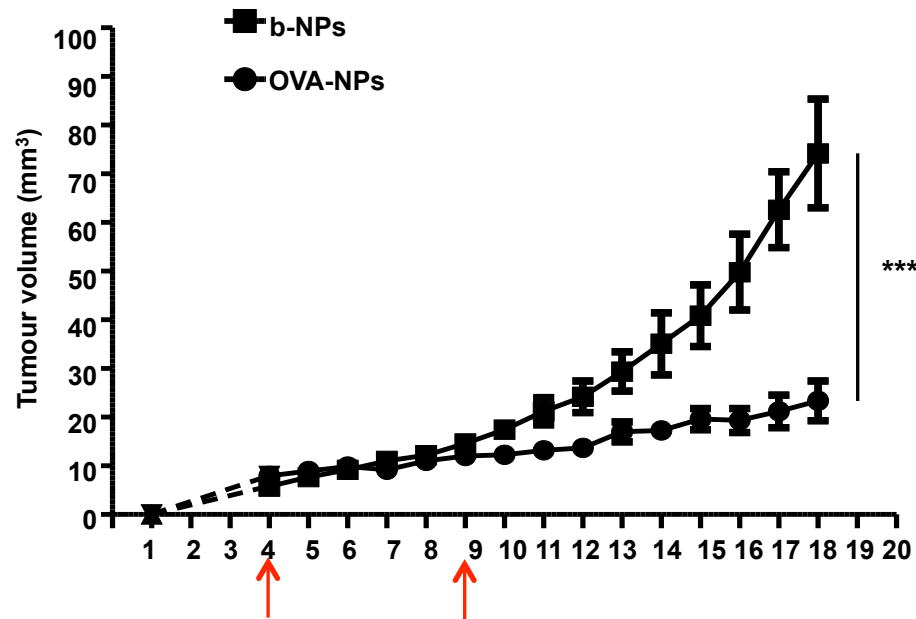

**Supplementary Figure 5: Microneedle vaccination of OVA-nanoparticles induces therapeutic anti-tumour responses.** Mice were injected with 10<sup>5</sup> B16.OVA melanoma cells, and at days 4 and 9 days (denoted by arrows), mice were immunized with b-NPs or OVA-NPs. Measured tumour volumes in mice treated with b-NPs or OVA-NPs *via* MNs over 18 days post challenge are shown.
